# Supplementary material for: Comparison of mechanochemical methods in the synthesis of binaphthol–benzoquinone based cocrystals
Source: Royal Society of Chemistry journal article supplement (doi:10.1039/d3cp04713j), 2024-01-01
Supplement: d3cp04713j1.pdf [file d3cp04713j1.pdf]

## Comparison of mechanochemical methods in the synthesis of Binaphthol-Benzoquinone based cocrystals

Siddarth Nagapudi<sup>a</sup> and Karthik Nagapudi<sup>\*b</sup>

Supplementary information

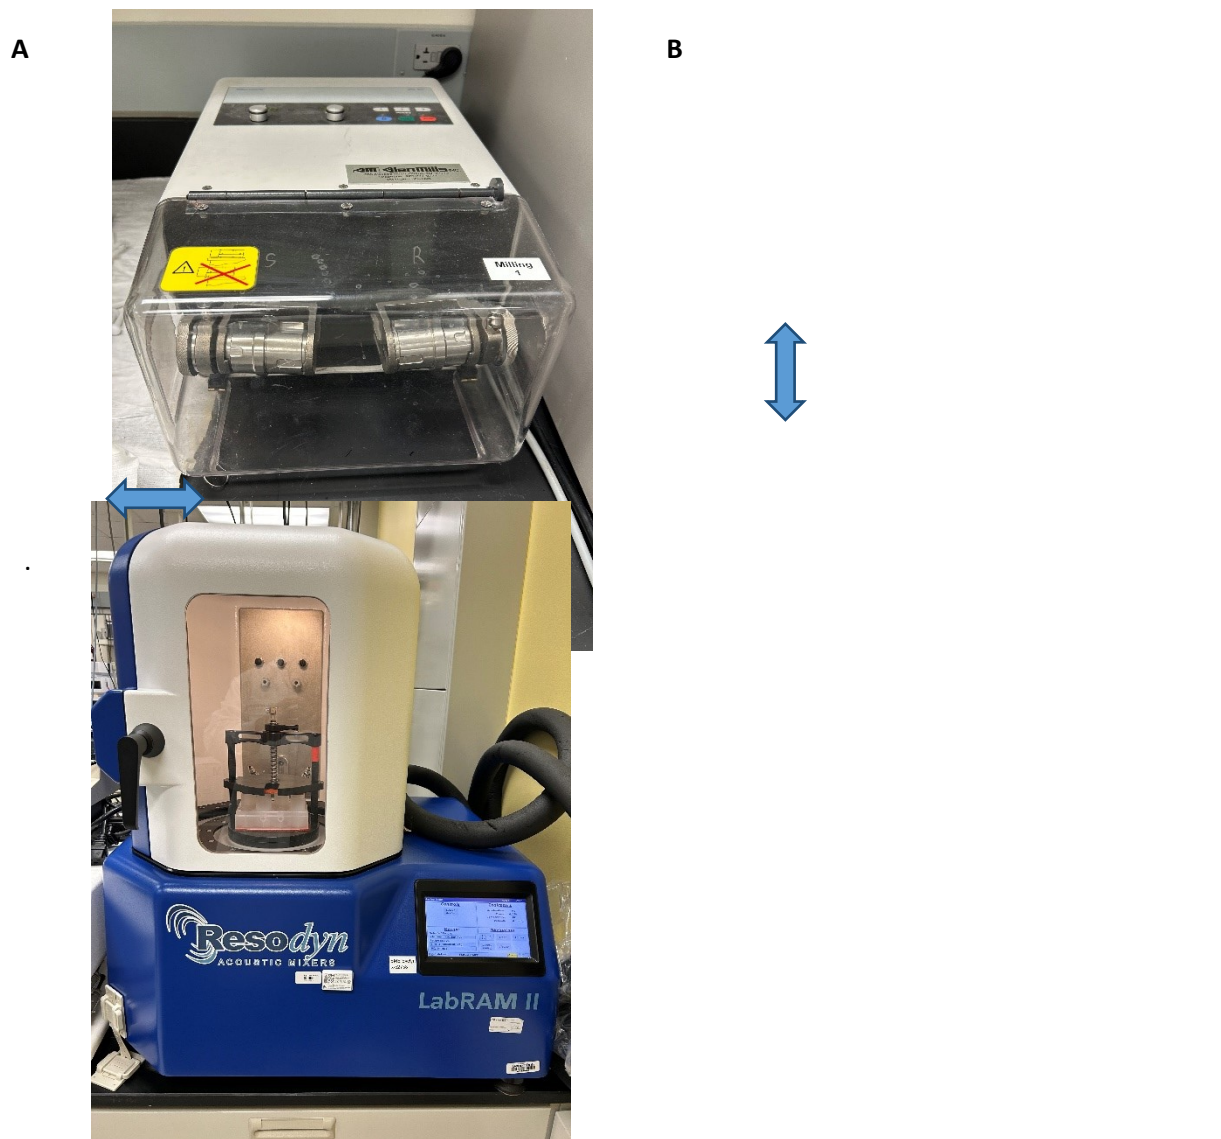

**Figure S1.** A: Retsch Ball Mill model #MM301. B: LabRAM II. The blue arrows indicate the direction of motion of the mixing vessels.

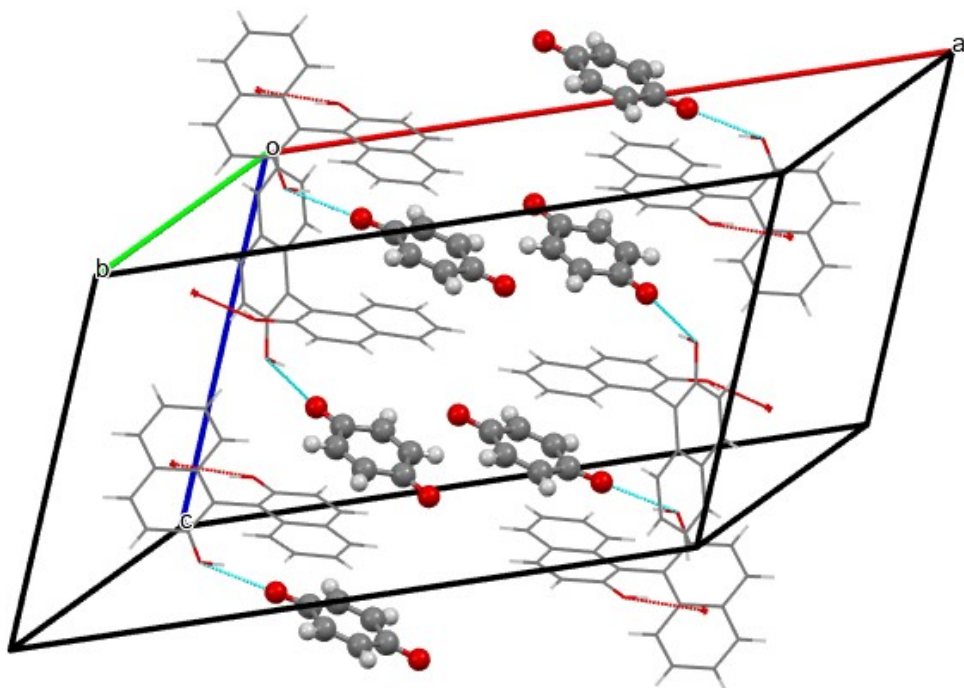

**Figure S2:** Stereo view of the molecular packing of Cocrystal I. The rBN molecules are represented as wireframes while the BQ molecule is represented using a ball and stick model. The blue lines indicate hydrogen bonds. Cocrystal I crystallizes in a monoclinic space group  $C2/c$  and has a 1: 1.5 mole ratio of rBN:BQ. The BQ molecules are sandwiched between R- and S-BN molecules. The view was modeled using Mercury® (version 4.2) software based on crystal structure determined by Kuroda et al.<sup>1</sup>

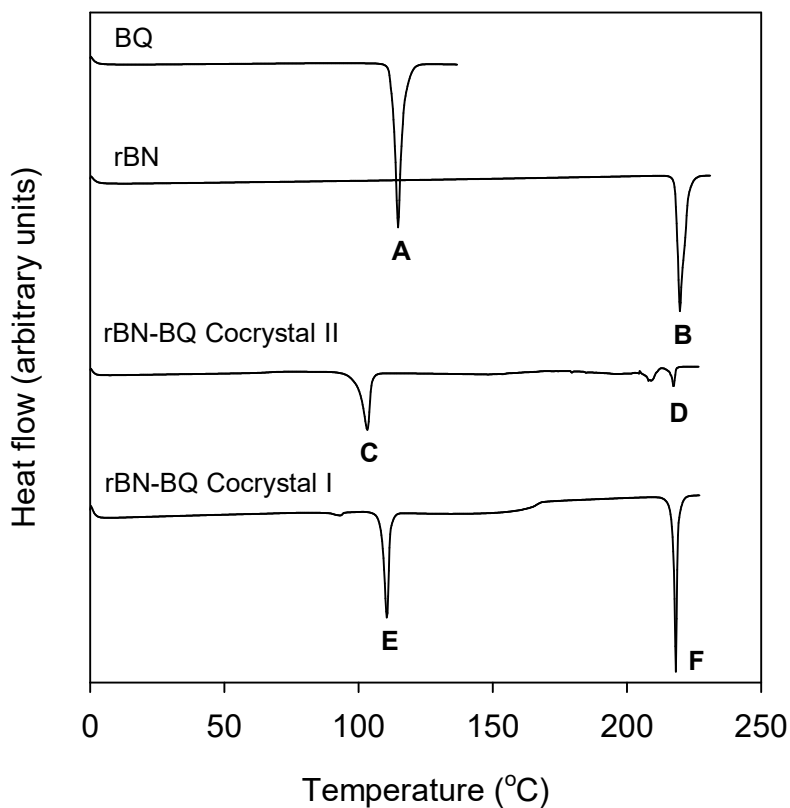

**Figure S3:** DSC thermograms of Benzoquinone (BQ), Racemic bi-Naphtol (rBN), Cocrystal II (1:1), and Cocrystal I (1:1.5). **A:** Melting endotherm of BQ, onset temperature = 112.5 °C and Heat of fusion = 163.2 J/g, **B:** Melting endotherm of BQ, onset temperature = 218.5 °C and Heat of fusion = 118. J/g, **C:** Melting endotherm of Cocrystal II, onset temperature = 99.7 °C and Heat of fusion = 58.9 J/g, **D:** Minor endotherm associated with the melting of residual rBN (onset and heat of fusion values not reported due to baseline interference), **E:** Melting endotherm of Cocrystal I, onset temperature = 108.6 °C and Heat of fusion = 68.2 J/g, **F:** Endotherm associated with the melting of residual rBN, onset temperature = 217.4 °C and Heat of fusion = 82.1 J/g.

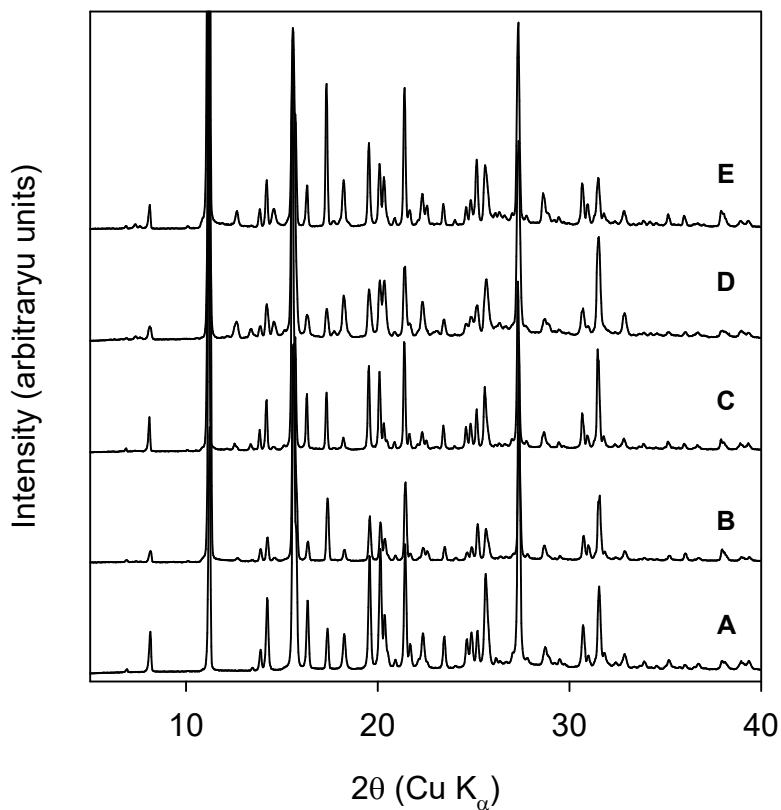

**Figure S4.** XRPD data of rBN/BQ samples subjected to RAM. **A:** Physical mixture of rBN and BQ, **B:** 1:1 rBN:BQ RAM at 75 Hz for 90 minutes, **C:** 1:1.5 rBN:BQ RAM at 75 Hz for 90 minutes, **D:** 1:2.5 rBN:BQ RAM at 90 Hz for 180 minutes, and **E:** 1:2.5 rBN:BQ RAM at 90 Hz for 540 minutes.

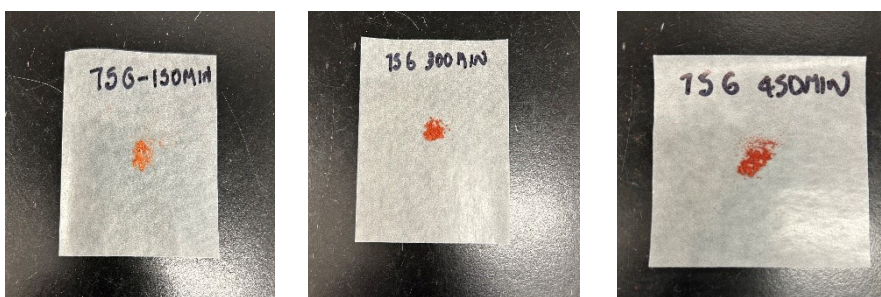

**Figure S5.** Color of samples of rBN/BQ at a 1:2.5 mole ratio after being subjected to RAM at 75 Hz for time periods ranging from 150 to 450 minutes.

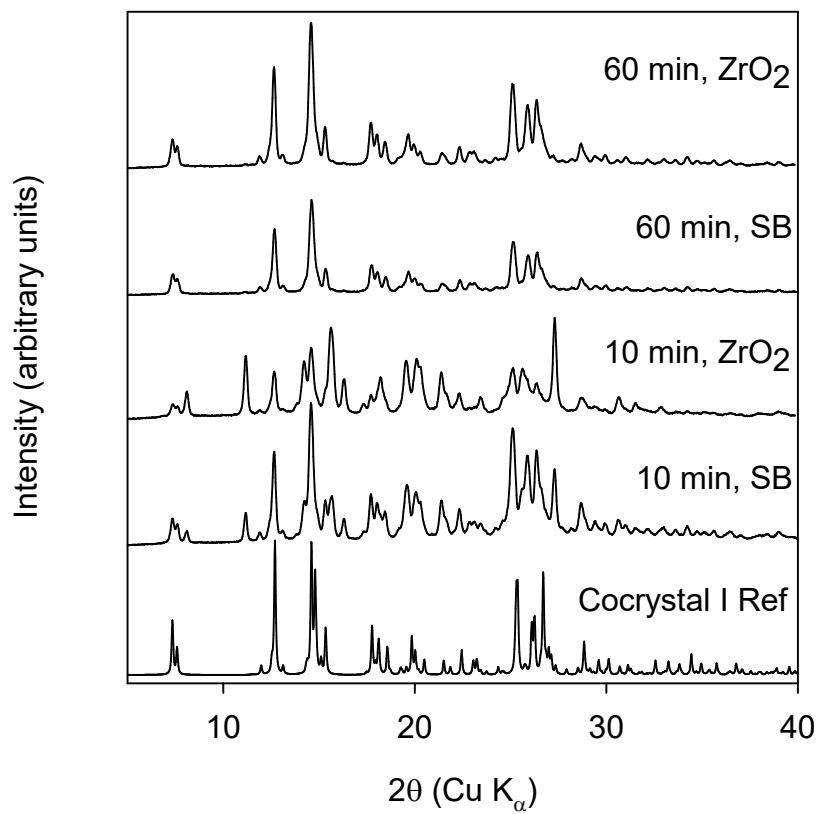

**Figure S6.** XRPD data of rBN/BQ at a 1:1.5 mole ratio samples subjected to BM with steel balls and ZrO<sub>2</sub> balls shown in comparison with the calculated powder data for Cocrystal I.

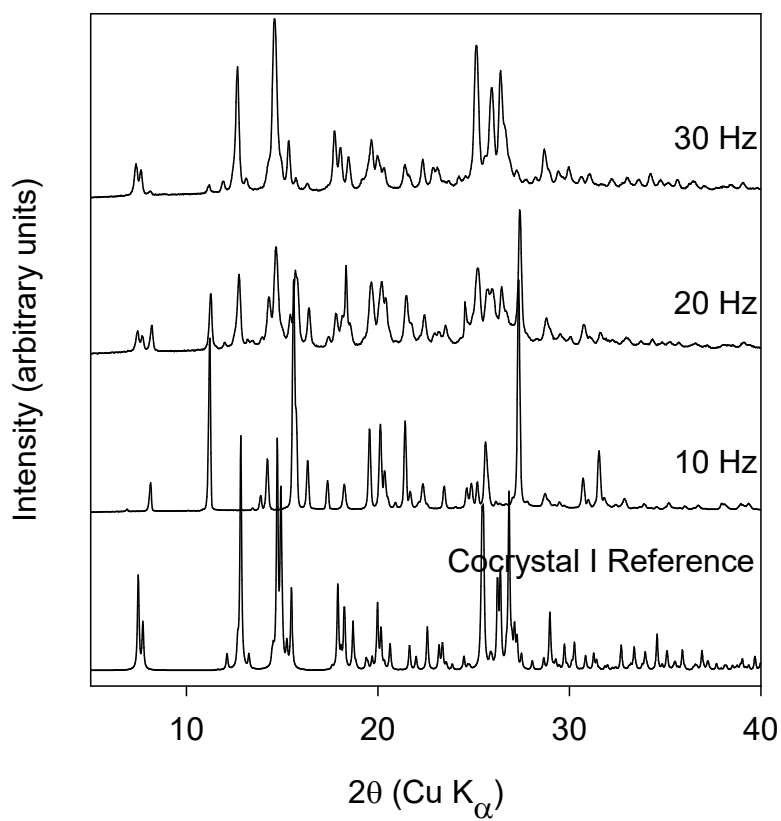

**Figure S7.** XRPD data of rBN/BQ at a 1:2 mole ratio samples subjected to BM shown in comparison with the calculated powder data for Cocystal I.

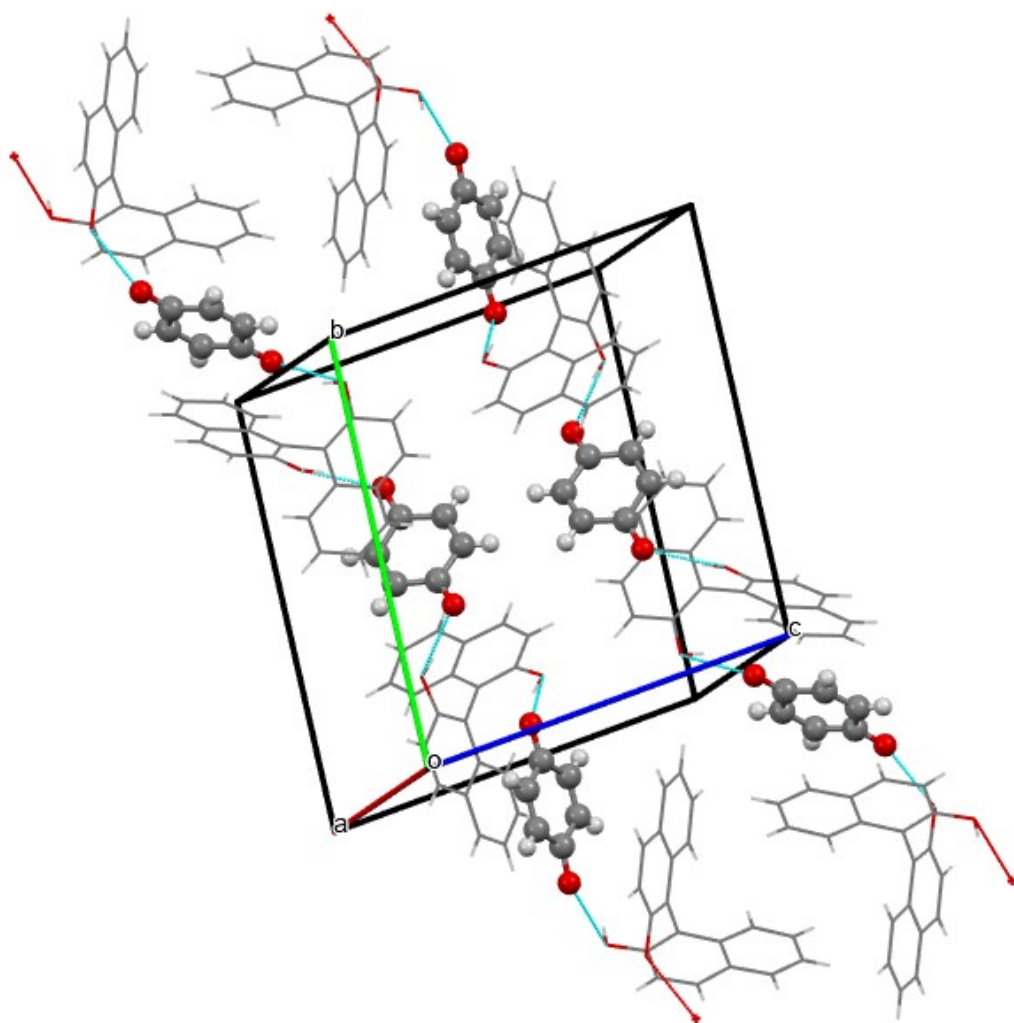

**Figure S8:** Stereo view of the molecular packing of Cocrystal II. The rBN molecules are represented as wireframes while the BQ molecule is represented using a ball and stick model. **Cocrystal II** crystallizes in a triclinic space group P1 with a mole ratio of 1:1 mole ratio of rBN:BQ. The BQ molecules are sandwiched between homochiral BN molecules. The view was modeled using Mercury® (version 4.2) software based on crystal structure determined by Kuroda et al.<sup>1</sup>

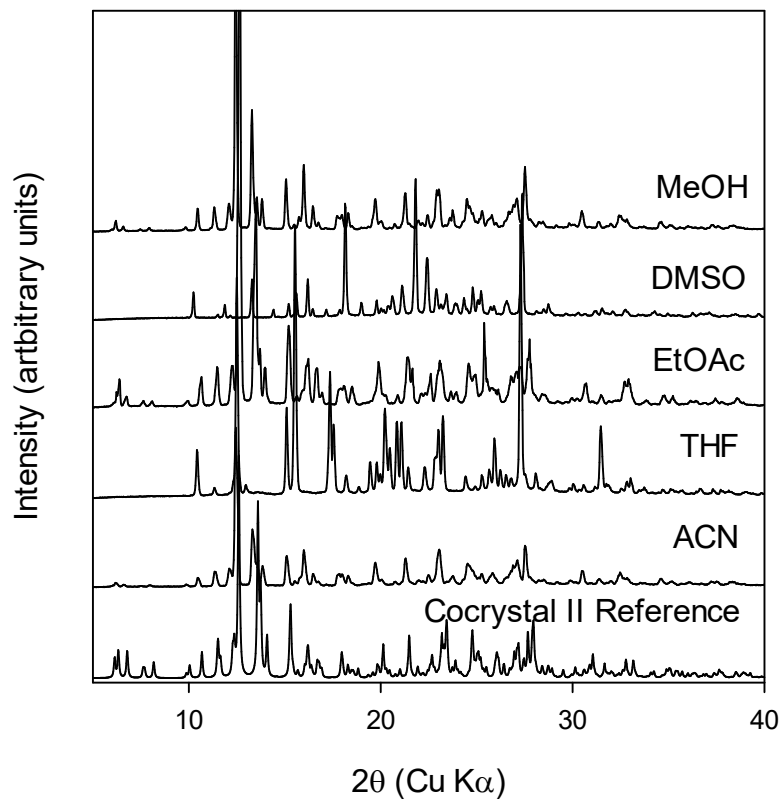

**Figure S9.** XRPD data of rBN/BQ at a 1:1 mole ratio samples subjected to RAM in the presence of liquid additives at a  $\eta$  of 0.5 shown in comparison with the calculated powder data for Cocystal II.



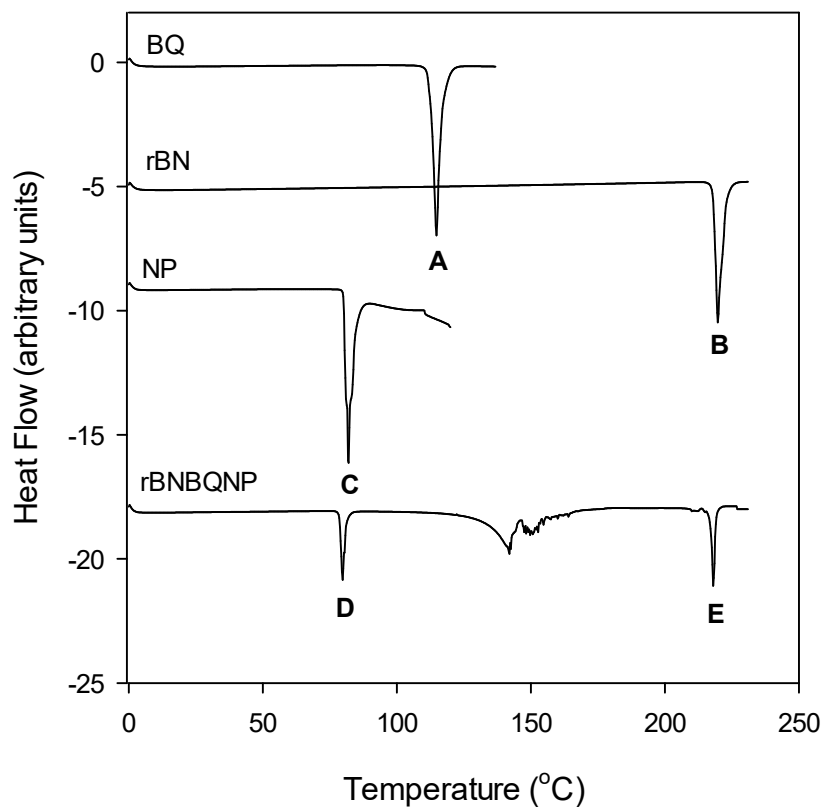

**Figure S10:** DSC thermograms of Benzoquinone (BQ), Racemic bi-Naphtol (rBN), Naphthalene (NP), and the ternary cocrystal rBNBQNP (2:1:2). **A:** Melting endotherm of BQ, onset temperature = 112.5 °C and Heat of fusion = 163.2 J/g, **B:** Melting endotherm of BQ, onset temperature = 218.5 °C and Heat of fusion = 118. J/g, **C:** Melting endotherm of NP, onset temperature = 80.1 °C and Heat of fusion = 136.3 J/g, **D:** Melting endotherm of ternary cocrystal, onset temperature = 78.6 °C and Heat of fusion = 31.5 J/g, **E:** Endotherm associated with the melting of residual rBN, onset temperature = 217.3 °C and Heat of fusion = 32.9 J/g.

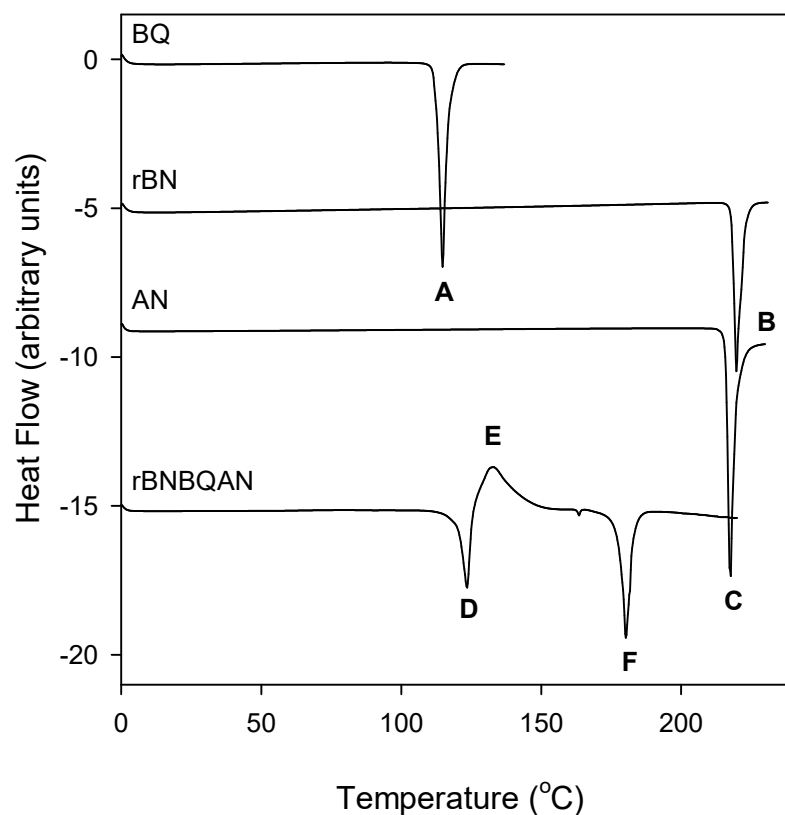

**Figure S11:** DSC thermograms of Benzoquinone (BQ), Racemic bi-Naphtol (rBN), Naphthalene (NP), and the ternary cocrystal rBNBQAN (2:2:1). **A:** Melting endotherm of BQ, onset temperature = 112.5 °C and Heat of fusion = 163.2 J/g, **B:** Melting endotherm of BQ, onset temperature = 218.5 °C and Heat of fusion = 118. J/g, **C:** Melting endotherm of AN, onset temperature = 216.0 °C and Heat of fusion = 185.5 J/g, **D:** Melting endotherm of ternary cocrystal, onset temperature = 120.0 °C (Heat of fusion could not be calculated due to interference from exotherm **E**), **E:** Exotherm likely associated crystallization of a new phase, peak temperature = 132.4 °C (heat associated with the exotherm could not be calculated due to interference from endotherm **E**), and **F:** Endotherm likely associated with the melting of the new phase produced by crystallization event **E**, onset temperature = 178.6 °C and Heat of fusion = 111.6 J/g.

## References

1. R. Kuroda, Y. Imai and N. Tajima, *Chemical Communications*, 2002, DOI: 10.1039/B207417F, 2848-2849.
